# Supplementary material
Source: HighWire-hosted journal article supplement (https://heartasia.bmj.com/content/11/1/e011120)

3:49:03

Male  
20yrs

**Vent. Rate** 60bpm  
**PR interval** 154ms  
**QRS duration** 98ms  
**QT/QTc** 402/402ms  
**P-R-T axes** 31/40/12°  
**P duration** 104ms  
**RR/PP interval** 994/1000ms

**Sport:** Cycling

Borderline ECG

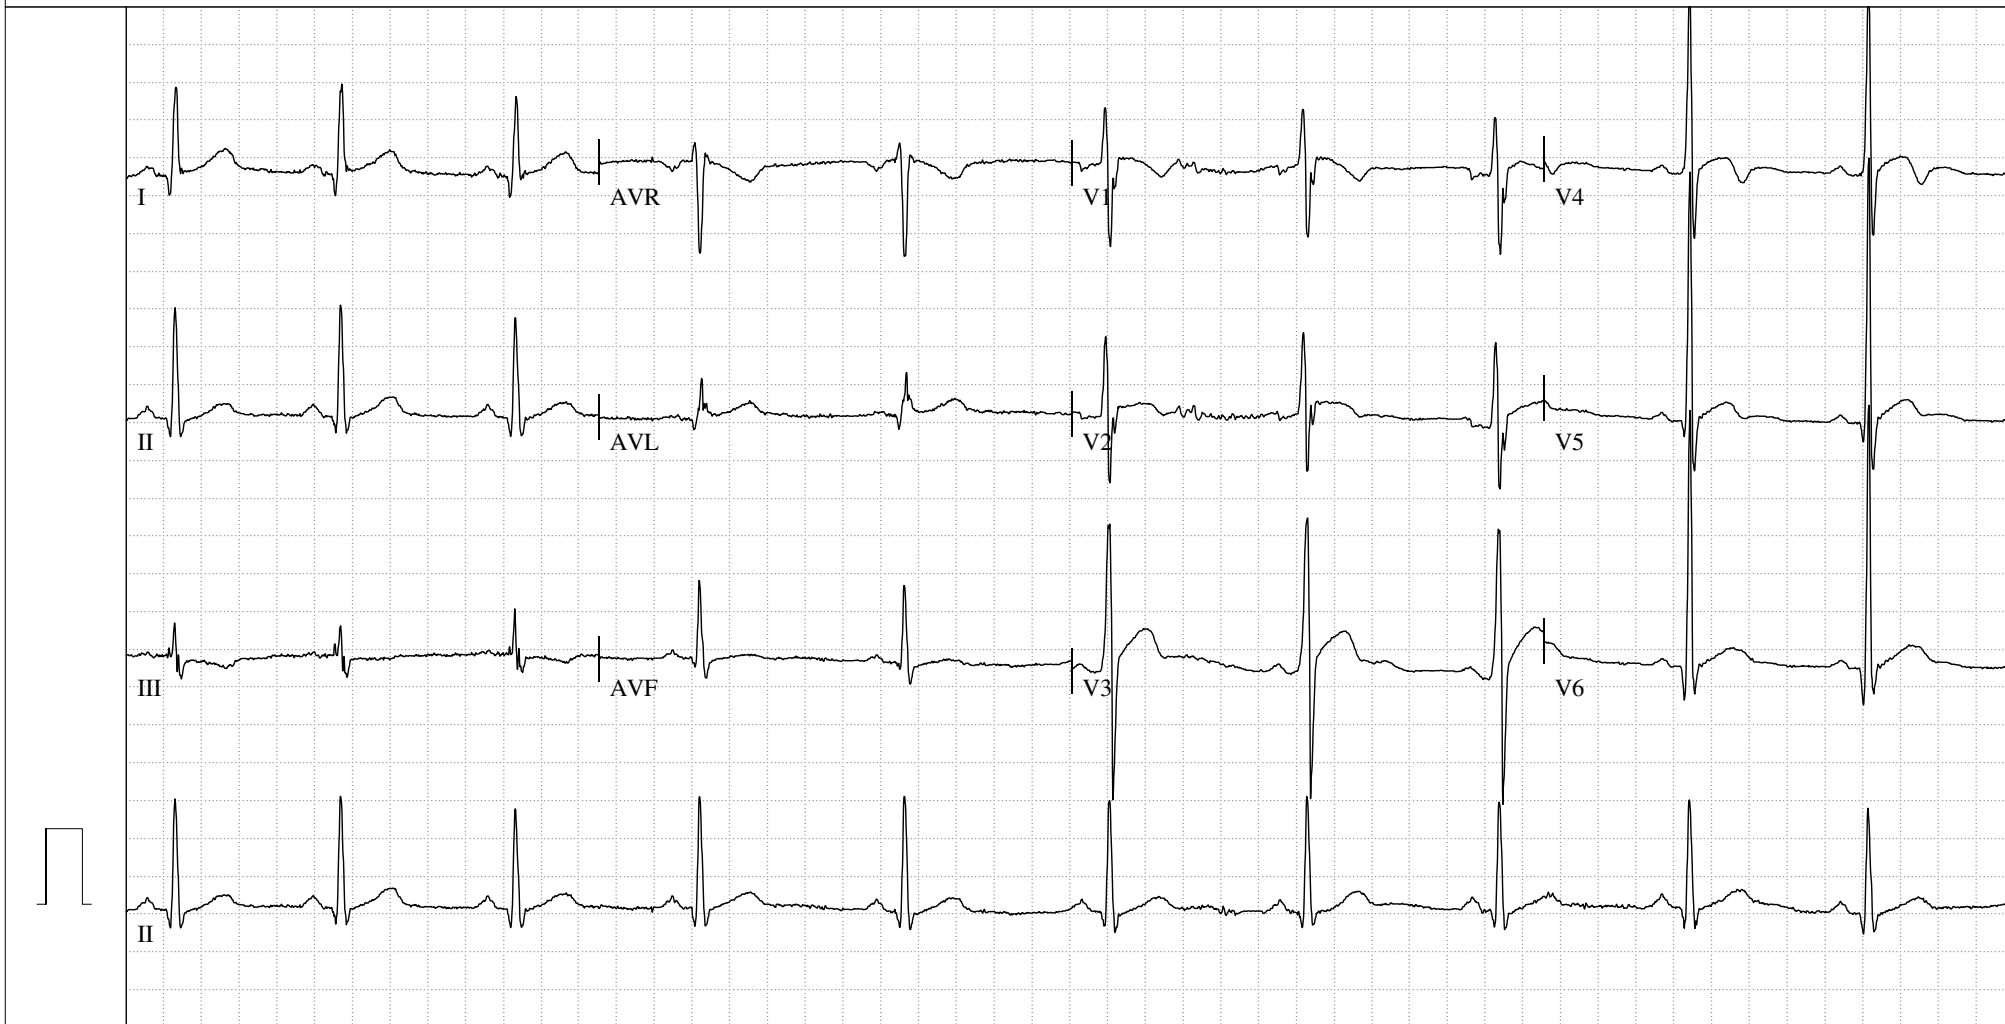

Supplement: inline-supplementary-material-4 [file inline-supplementary-material-4.pdf]
